# Supplementary material for: Usefulness of Measuring Serum Amyloid A Concentration in Japanese Black Cattle in Clinical Practice
Source: MDPI journal article supplement (doi:10.3390/vetsci10080528), 2023-08-17
Supplement: s1 [file s1]

**Table S1.** Measurement parameters and method in the present study

|                                                                                                   |                                           |                                             |            |
|---------------------------------------------------------------------------------------------------|-------------------------------------------|---------------------------------------------|------------|
| <u>Blood cell</u><br>(Automatic blood cell<br>calculator: SYSMEX)                                 | Red blood cell (RBC)                      | <u>Electrolytes</u>                         | Na         |
|                                                                                                   | White blood cell (WBC)                    | (Electrolyte<br>analyzer: Techno<br>Medica) | K          |
|                                                                                                   | Lymphocyte ratio                          |                                             | Cl         |
| <u>Protein electrophoresis</u><br>(Fully automated<br>capillary electrophoresis<br>system: Sebia) | $\alpha$ -globulin                        | <u>Thermal</u>                              | Fibrinogen |
|                                                                                                   | $\beta$ -globulin                         | <u>precipitation</u>                        |            |
|                                                                                                   | $\gamma$ -globulin                        | <u>refractometer</u><br><u>method</u>       |            |
| <u>Biochemical analysis</u><br>(Automatic analyzer:<br>Hitachi 7180)                              | Aminotransferase (AST)                    | Total cholesterol (T-Chol)                  |            |
|                                                                                                   | $\gamma$ -glutamyltranspeptidase<br>(GGT) | Free fatty acid (FFA)                       |            |
|                                                                                                   | Total protein (TP)                        | Total bilirubin (Bill)                      |            |
|                                                                                                   | Albumin (ALB)                             | Calcium (Ca)                                |            |
|                                                                                                   | AG ratio (AG)                             | Inorganic phosphorus (IP)                   |            |
|                                                                                                   | Urea nitrogen (BUN)                       | Magnesium (Mg)                              |            |
|                                                                                                   | Blood glucose (Glu)                       | Iron (Fe)                                   |            |
|                                                                                                   | Serum amyloid A (SAA)                     | Sialic acid                                 |            |
